# Supplementary material
Source: publisher figshare collection journal article supplement (https://acs.figshare.com/ndownloader/files/4772764)
Supplement: Supplementary file 1 [file 4772764]

  
data_k0620 
  
_audit_creation_method            SHELXL-97 
_chemical_name_systematic 
; 
 ? 
; 
_chemical_name_common             ? 
_chemical_melting_point           ? 
_chemical_formula_moiety          'C28 H25 Cl2 N O2'  
_chemical_formula_sum 
 'C28 H25 Cl2 N O2' 
_chemical_formula_weight          478.39 
  
loop_ 
 _atom_type_symbol 
 _atom_type_description 
 _atom_type_scat_dispersion_real 
 _atom_type_scat_dispersion_imag 
 _atom_type_scat_source 
 'C'  'C'   0.0033   0.0016 
 'International Tables Vol C Tables 4.2.6.8 and 6.1.1.4' 
 'H'  'H'   0.0000   0.0000 
 'International Tables Vol C Tables 4.2.6.8 and 6.1.1.4' 
 'N'  'N'   0.0061   0.0033 
 'International Tables Vol C Tables 4.2.6.8 and 6.1.1.4' 
 'O'  'O'   0.0106   0.0060 
 'International Tables Vol C Tables 4.2.6.8 and 6.1.1.4' 
 'Cl'  'Cl'   0.1484   0.1585 
 'International Tables Vol C Tables 4.2.6.8 and 6.1.1.4' 
  
_symmetry_cell_setting            Monoclinic 
_symmetry_space_group_name_H-M    'P 21/n' 
_symmetry_space_group_name_Hall    '-P 2yn' 
  
loop_ 
 _symmetry_equiv_pos_as_xyz 
 'x, y, z' 
 '-x+1/2, y+1/2, -z+1/2' 
 '-x, -y, -z' 
 'x-1/2, -y-1/2, z-1/2' 
  
_cell_length_a                    8.8645(2) 
_cell_length_b                    24.7243(8) 
_cell_length_c                    11.4315(3) 
_cell_angle_alpha                 90.00 
_cell_angle_beta                  107.6990(17) 
_cell_angle_gamma                 90.00 
_cell_volume                      2386.84(11) 
_cell_formula_units_Z             4 
_cell_measurement_temperature     150(2) 
_cell_measurement_reflns_used     16246 
_cell_measurement_theta_min       2.6 
_cell_measurement_theta_max       27.5 
  
_exptl_crystal_description        'block' 
_exptl_crystal_colour             'yellow' 
_exptl_crystal_size_max           0.27 
_exptl_crystal_size_mid           0.26 
_exptl_crystal_size_min           0.26 
_exptl_crystal_density_meas       ? 
_exptl_crystal_density_diffrn     1.331 
_exptl_crystal_density_method     'not measured' 
_exptl_crystal_F_000              1000 
_exptl_absorpt_coefficient_mu     0.298 
_exptl_absorpt_correction_type   none 
_exptl_absorpt_correction_T_min  ?
_exptl_absorpt_correction_T_max  ?
_exptl_absorpt_process_details
;
?
;
  
_exptl_special_details 
; 
 ? 
; 
  
_diffrn_ambient_temperature       150(1) 
_diffrn_radiation_wavelength      0.71073 
_diffrn_radiation_type            MoK\a 
_diffrn_radiation_source          'fine-focus sealed tube' 
_diffrn_radiation_monochromator   graphite 
_diffrn_measurement_device_type   'Bruker-Nonius KappaCCD' 
_diffrn_measurement_method        '\f scans and \w scans with \k offsets' 
_diffrn_detector_area_resol_mean  9 
_diffrn_standards_number          0 
_diffrn_standards_interval_count  ? 
_diffrn_standards_interval_time   ? 
_diffrn_standards_decay_%         ? 
_diffrn_reflns_number             16246 
_diffrn_reflns_av_R_equivalents   0.0871 
_diffrn_reflns_av_sigmaI/netI     0.0701 
_diffrn_reflns_limit_h_min        -11 
_diffrn_reflns_limit_h_max        11 
_diffrn_reflns_limit_k_min        -32 
_diffrn_reflns_limit_k_max        32 
_diffrn_reflns_limit_l_min        -11 
_diffrn_reflns_limit_l_max        14 
_diffrn_reflns_theta_min          2.55 
_diffrn_reflns_theta_max          27.50 
_reflns_number_total              5459 
_reflns_number_gt                 3749 
_reflns_threshold_expression      'I>2\s(I)' 
  
_computing_data_collection        'Collect (Nonius BV, 1997-2003)' 
_computing_cell_refinement        'Denzo-SMN (Otwinowski & Minor, 1997)' 
_computing_data_reduction         'Denzo-SMN' 
_computing_structure_solution     'SIR-92 (Altomare et al., 1994)' 
_computing_structure_refinement   'SHELXTL V6.1(Sheldrick, 2001)' 
_computing_molecular_graphics     'SHELXTL V6.1' 
_computing_publication_material   'SHELXTL V6.1'
  
_refine_special_details 
; 
 Refinement of F^2^ against ALL reflections.  The weighted R-factor wR and 
 goodness of fit S are based on F^2^, conventional R-factors R are based 
 on F, with F set to zero for negative F^2^. The threshold expression of 
 F^2^ > 2sigma(F^2^) is used only for calculating R-factors(gt) etc. and is 
 not relevant to the choice of reflections for refinement.  R-factors based 
 on F^2^ are statistically about twice as large as those based on F, and R- 
 factors based on ALL data will be even larger. 
; 
  
_refine_ls_structure_factor_coef  Fsqd 
_refine_ls_matrix_type            full 
_refine_ls_weighting_scheme       calc 
_refine_ls_weighting_details 
 'calc w=1/[\s^2^(Fo^2^)+(0.0686P)^2^+0.4514P] where P=(Fo^2^+2Fc^2^)/3' 
_atom_sites_solution_primary      direct 
_atom_sites_solution_secondary    difmap 
_atom_sites_solution_hydrogens    geom 
_refine_ls_hydrogen_treatment     constr
_refine_ls_extinction_method      SHELXL 
_refine_ls_extinction_coef        0.0055(15) 
_refine_ls_extinction_expression 
 'Fc^*^=kFc[1+0.001xFc^2^\l^3^/sin(2\q)]^-1/4^' 
_refine_ls_number_reflns          5459 
_refine_ls_number_parameters      301 
_refine_ls_number_restraints      0 
_refine_ls_R_factor_all           0.0837 
_refine_ls_R_factor_gt            0.0485 
_refine_ls_wR_factor_ref          0.1420 
_refine_ls_wR_factor_gt           0.1215 
_refine_ls_goodness_of_fit_ref    1.029 
_refine_ls_restrained_S_all       1.029 
_refine_ls_shift/su_max           0.001 
_refine_ls_shift/su_mean          0.000 
  
loop_ 
 _atom_site_label 
 _atom_site_type_symbol 
 _atom_site_fract_x 
 _atom_site_fract_y 
 _atom_site_fract_z 
 _atom_site_U_iso_or_equiv 
 _atom_site_adp_type 
 _atom_site_occupancy 
 _atom_site_symmetry_multiplicity 
 _atom_site_calc_flag 
 _atom_site_refinement_flags 
 _atom_site_disorder_assembly 
 _atom_site_disorder_group 
Cl1 Cl 0.41821(7) 0.36014(2) 0.42456(5) 0.04060(18) Uani 1 1 d . . . 
Cl2 Cl 0.05977(6) 0.27024(2) 0.00587(6) 0.04448(19) Uani 1 1 d . . . 
O1 O 0.5257(2) 0.54751(6) 0.16390(16) 0.0451(4) Uani 1 1 d . . . 
O2 O 0.45347(18) 0.49086(6) 0.29165(14) 0.0391(4) Uani 1 1 d . . . 
N1 N 0.76960(19) 0.37243(6) 0.27624(15) 0.0264(4) Uani 1 1 d . . . 
C1 C 0.6291(2) 0.40648(8) 0.26885(18) 0.0267(4) Uani 1 1 d . . . 
H1A H 0.6287 0.4152 0.3542 0.032 Uiso 1 1 calc R . . 
C2 C 0.6386(2) 0.45895(8) 0.20263(18) 0.0295(5) Uani 1 1 d . . . 
C3 C 0.7325(2) 0.46348(8) 0.13057(19) 0.0337(5) Uani 1 1 d . . . 
H3A H 0.7268 0.4956 0.0839 0.040 Uiso 1 1 calc R . . 
C4 C 0.8410(3) 0.42200(8) 0.1209(2) 0.0357(5) Uani 1 1 d . . . 
C5 C 0.8566(2) 0.37940(8) 0.19859(19) 0.0309(5) Uani 1 1 d . . . 
H5A H 0.9337 0.3527 0.1984 0.037 Uiso 1 1 calc R . . 
C6 C 0.9384(4) 0.42667(11) 0.0340(3) 0.0584(8) Uani 1 1 d . . . 
H6A H 1.0045 0.3943 0.0409 0.088 Uiso 1 1 calc R . . 
H6B H 1.0063 0.4588 0.0550 0.088 Uiso 1 1 calc R . . 
H6C H 0.8679 0.4300 -0.0503 0.088 Uiso 1 1 calc R . . 
C7 C 0.5368(2) 0.50403(8) 0.2142(2) 0.0336(5) Uani 1 1 d . . . 
C8 C 0.3517(3) 0.53207(10) 0.3171(2) 0.0464(6) Uani 1 1 d . . . 
H8A H 0.2778 0.5460 0.2395 0.056 Uiso 1 1 calc R . . 
H8B H 0.4157 0.5626 0.3620 0.056 Uiso 1 1 calc R . . 
C9 C 0.2620(3) 0.50624(12) 0.3933(3) 0.0612(8) Uani 1 1 d . . . 
H9A H 0.1989 0.5337 0.4190 0.092 Uiso 1 1 calc R . . 
H9B H 0.3365 0.4897 0.4660 0.092 Uiso 1 1 calc R . . 
H9C H 0.1917 0.4783 0.3450 0.092 Uiso 1 1 calc R . . 
C10 C 0.4796(2) 0.37439(8) 0.20495(18) 0.0261(4) Uani 1 1 d . . . 
C11 C 0.3832(2) 0.35012(8) 0.26672(18) 0.0297(5) Uani 1 1 d . . . 
C12 C 0.2549(2) 0.31764(8) 0.2075(2) 0.0338(5) Uani 1 1 d . . . 
H12A H 0.1923 0.3010 0.2517 0.041 Uiso 1 1 calc R . . 
C13 C 0.2210(2) 0.31030(8) 0.0822(2) 0.0322(5) Uani 1 1 d . . . 
C14 C 0.3102(2) 0.33466(8) 0.0162(2) 0.0312(5) Uani 1 1 d . . . 
H14A H 0.2841 0.3297 -0.0701 0.037 Uiso 1 1 calc R . . 
C15 C 0.4380(2) 0.36636(8) 0.07845(18) 0.0284(4) Uani 1 1 d . . . 
H15A H 0.4994 0.3832 0.0336 0.034 Uiso 1 1 calc R . . 
C16 C 0.8104(2) 0.33302(8) 0.37755(17) 0.0253(4) Uani 1 1 d . . . 
H16A H 0.7078 0.3210 0.3885 0.030 Uiso 1 1 calc R . . 
C17 C 0.9041(2) 0.35954(8) 0.49837(18) 0.0282(4) Uani 1 1 d . . . 
C18 C 0.8799(3) 0.34291(9) 0.6075(2) 0.0366(5) Uani 1 1 d . . . 
H18A H 0.8017 0.3164 0.6057 0.044 Uiso 1 1 calc R . . 
C19 C 0.9693(3) 0.36479(10) 0.7193(2) 0.0447(6) Uani 1 1 d . . . 
H19A H 0.9520 0.3533 0.7934 0.054 Uiso 1 1 calc R . . 
C20 C 1.0833(3) 0.40337(10) 0.7221(2) 0.0464(6) Uani 1 1 d . . . 
H20A H 1.1457 0.4179 0.7984 0.056 Uiso 1 1 calc R . . 
C21 C 1.1067(3) 0.42079(10) 0.6146(2) 0.0438(6) Uani 1 1 d . . . 
H21A H 1.1836 0.4478 0.6168 0.053 Uiso 1 1 calc R . . 
C22 C 1.0180(3) 0.39886(9) 0.5029(2) 0.0354(5) Uani 1 1 d . . . 
H22A H 1.0353 0.4108 0.4291 0.042 Uiso 1 1 calc R . . 
C23 C 0.8888(2) 0.28236(8) 0.34655(18) 0.0256(4) Uani 1 1 d . . . 
C24 C 1.0384(2) 0.26520(8) 0.41704(19) 0.0299(5) Uani 1 1 d . . . 
H24A H 1.0976 0.2866 0.4845 0.036 Uiso 1 1 calc R . . 
C25 C 1.1022(3) 0.21704(9) 0.3898(2) 0.0349(5) Uani 1 1 d . . . 
H25A H 1.2039 0.2056 0.4391 0.042 Uiso 1 1 calc R . . 
C26 C 1.0174(3) 0.18591(9) 0.2909(2) 0.0354(5) Uani 1 1 d . . . 
H26A H 1.0608 0.1531 0.2720 0.042 Uiso 1 1 calc R . . 
C27 C 0.8693(3) 0.20284(9) 0.2200(2) 0.0363(5) Uani 1 1 d . . . 
H27A H 0.8108 0.1816 0.1522 0.044 Uiso 1 1 calc R . . 
C28 C 0.8054(2) 0.25054(8) 0.24716(18) 0.0306(5) Uani 1 1 d . . . 
H28A H 0.7035 0.2617 0.1975 0.037 Uiso 1 1 calc R . . 
  
loop_ 
 _atom_site_aniso_label 
 _atom_site_aniso_U_11 
 _atom_site_aniso_U_22 
 _atom_site_aniso_U_33 
 _atom_site_aniso_U_23 
 _atom_site_aniso_U_13 
 _atom_site_aniso_U_12 
Cl1 0.0492(3) 0.0489(4) 0.0287(3) 0.0057(2) 0.0194(2) 0.0108(3) 
Cl2 0.0352(3) 0.0399(3) 0.0574(4) -0.0022(3) 0.0126(3) -0.0080(2) 
O1 0.0557(10) 0.0258(8) 0.0518(10) 0.0055(7) 0.0135(8) 0.0059(7) 
O2 0.0482(9) 0.0289(8) 0.0415(9) 0.0000(7) 0.0158(7) 0.0122(7) 
N1 0.0312(9) 0.0236(8) 0.0247(9) 0.0036(7) 0.0089(7) 0.0044(7) 
C1 0.0331(10) 0.0249(10) 0.0220(10) -0.0011(8) 0.0082(8) 0.0036(8) 
C2 0.0362(11) 0.0228(10) 0.0255(10) 0.0001(8) 0.0033(8) 0.0001(8) 
C3 0.0444(13) 0.0232(10) 0.0315(11) 0.0038(8) 0.0083(10) -0.0021(9) 
C4 0.0472(13) 0.0291(11) 0.0350(12) 0.0031(9) 0.0187(10) 0.0000(10) 
C5 0.0357(11) 0.0283(11) 0.0303(11) 0.0008(9) 0.0125(9) 0.0027(9) 
C6 0.079(2) 0.0465(15) 0.0663(18) 0.0207(14) 0.0476(16) 0.0164(14) 
C7 0.0365(11) 0.0252(11) 0.0331(11) -0.0031(9) 0.0017(9) 0.0017(9) 
C8 0.0517(14) 0.0360(13) 0.0505(15) -0.0026(11) 0.0139(12) 0.0168(11) 
C9 0.0677(17) 0.0578(17) 0.0662(19) 0.0084(14) 0.0322(15) 0.0291(15) 
C10 0.0297(10) 0.0222(10) 0.0282(10) 0.0020(8) 0.0114(8) 0.0064(8) 
C11 0.0356(11) 0.0299(11) 0.0259(10) 0.0051(8) 0.0130(9) 0.0105(9) 
C12 0.0340(11) 0.0300(11) 0.0422(13) 0.0084(9) 0.0185(10) 0.0048(9) 
C13 0.0298(11) 0.0268(11) 0.0408(12) 0.0013(9) 0.0120(9) 0.0024(8) 
C14 0.0333(11) 0.0302(11) 0.0313(11) -0.0021(9) 0.0114(9) 0.0037(9) 
C15 0.0327(11) 0.0290(10) 0.0265(10) 0.0007(8) 0.0134(8) 0.0010(9) 
C16 0.0283(10) 0.0253(10) 0.0221(10) 0.0021(8) 0.0074(8) 0.0016(8) 
C17 0.0318(10) 0.0237(10) 0.0270(10) -0.0021(8) 0.0057(8) 0.0061(8) 
C18 0.0475(13) 0.0313(12) 0.0299(11) -0.0001(9) 0.0102(9) 0.0032(10) 
C19 0.0641(16) 0.0413(14) 0.0250(11) -0.0001(10) 0.0080(11) 0.0085(12) 
C20 0.0548(15) 0.0392(13) 0.0328(13) -0.0101(10) -0.0054(11) 0.0088(12) 
C21 0.0419(13) 0.0384(13) 0.0438(14) -0.0094(11) 0.0023(10) -0.0032(11) 
C22 0.0361(11) 0.0355(12) 0.0340(12) -0.0051(9) 0.0100(9) -0.0023(10) 
C23 0.0303(10) 0.0238(10) 0.0236(10) 0.0019(8) 0.0093(8) -0.0003(8) 
C24 0.0320(11) 0.0269(11) 0.0301(11) 0.0016(8) 0.0082(8) -0.0019(9) 
C25 0.0332(11) 0.0321(12) 0.0408(13) 0.0060(9) 0.0132(10) 0.0057(9) 
C26 0.0455(13) 0.0284(11) 0.0383(12) -0.0010(9) 0.0217(10) 0.0040(10) 
C27 0.0494(13) 0.0308(11) 0.0304(11) -0.0054(9) 0.0149(10) -0.0037(10) 
C28 0.0372(11) 0.0284(11) 0.0254(10) 0.0011(8) 0.0083(9) 0.0009(9) 
  
_geom_special_details 
; 
 All esds (except the esd in the dihedral angle between two l.s. planes) 
 are estimated using the full covariance matrix.  The cell esds are taken 
 into account individually in the estimation of esds in distances, angles 
 and torsion angles; correlations between esds in cell parameters are only 
 used when they are defined by crystal symmetry.  An approximate (isotropic) 
 treatment of cell esds is used for estimating esds involving l.s. planes. 
; 
  
loop_ 
 _geom_bond_atom_site_label_1 
 _geom_bond_atom_site_label_2 
 _geom_bond_distance 
 _geom_bond_site_symmetry_2 
 _geom_bond_publ_flag 
Cl1 C11 1.753(2) . ? 
Cl2 C13 1.740(2) . ? 
O1 C7 1.209(3) . ? 
O2 C7 1.354(3) . ? 
O2 C8 1.448(3) . ? 
N1 C5 1.352(3) . ? 
N1 C16 1.472(2) . ? 
N1 C1 1.484(2) . ? 
C1 C2 1.517(3) . ? 
C1 C10 1.527(3) . ? 
C2 C3 1.342(3) . ? 
C2 C7 1.465(3) . ? 
C3 C4 1.433(3) . ? 
C4 C5 1.357(3) . ? 
C4 C6 1.506(3) . ? 
C8 C9 1.490(4) . ? 
C10 C15 1.394(3) . ? 
C10 C11 1.398(3) . ? 
C11 C12 1.389(3) . ? 
C12 C13 1.383(3) . ? 
C13 C14 1.386(3) . ? 
C14 C15 1.384(3) . ? 
C16 C23 1.526(3) . ? 
C16 C17 1.526(3) . ? 
C17 C18 1.390(3) . ? 
C17 C22 1.391(3) . ? 
C18 C19 1.392(3) . ? 
C19 C20 1.383(4) . ? 
C20 C21 1.375(4) . ? 
C21 C22 1.390(3) . ? 
C23 C24 1.392(3) . ? 
C23 C28 1.395(3) . ? 
C24 C25 1.394(3) . ? 
C25 C26 1.385(3) . ? 
C26 C27 1.382(3) . ? 
C27 C28 1.384(3) . ? 
  
loop_ 
 _geom_angle_atom_site_label_1 
 _geom_angle_atom_site_label_2 
 _geom_angle_atom_site_label_3 
 _geom_angle 
 _geom_angle_site_symmetry_1 
 _geom_angle_site_symmetry_3 
 _geom_angle_publ_flag 
C7 O2 C8 117.34(17) . . ? 
C5 N1 C16 123.24(16) . . ? 
C5 N1 C1 121.77(16) . . ? 
C16 N1 C1 114.92(15) . . ? 
N1 C1 C2 109.91(16) . . ? 
N1 C1 C10 108.91(15) . . ? 
C2 C1 C10 112.16(16) . . ? 
C3 C2 C7 120.39(19) . . ? 
C3 C2 C1 121.09(18) . . ? 
C7 C2 C1 118.45(18) . . ? 
C2 C3 C4 122.93(19) . . ? 
C5 C4 C3 116.2(2) . . ? 
C5 C4 C6 121.8(2) . . ? 
C3 C4 C6 121.92(19) . . ? 
N1 C5 C4 124.3(2) . . ? 
O1 C7 O2 122.9(2) . . ? 
O1 C7 C2 126.6(2) . . ? 
O2 C7 C2 110.47(18) . . ? 
O2 C8 C9 106.96(19) . . ? 
C15 C10 C11 116.98(19) . . ? 
C15 C10 C1 119.18(18) . . ? 
C11 C10 C1 123.78(18) . . ? 
C12 C11 C10 122.51(19) . . ? 
C12 C11 Cl1 116.47(16) . . ? 
C10 C11 Cl1 121.01(16) . . ? 
C13 C12 C11 117.96(19) . . ? 
C12 C13 C14 121.8(2) . . ? 
C12 C13 Cl2 118.77(16) . . ? 
C14 C13 Cl2 119.46(17) . . ? 
C15 C14 C13 118.7(2) . . ? 
C14 C15 C10 122.09(19) . . ? 
N1 C16 C23 112.40(16) . . ? 
N1 C16 C17 111.32(16) . . ? 
C23 C16 C17 113.68(16) . . ? 
C18 C17 C22 118.76(19) . . ? 
C18 C17 C16 119.64(19) . . ? 
C22 C17 C16 121.56(19) . . ? 
C17 C18 C19 120.6(2) . . ? 
C20 C19 C18 119.8(2) . . ? 
C21 C20 C19 120.2(2) . . ? 
C20 C21 C22 120.1(2) . . ? 
C21 C22 C17 120.6(2) . . ? 
C24 C23 C28 118.39(18) . . ? 
C24 C23 C16 122.47(17) . . ? 
C28 C23 C16 119.08(17) . . ? 
C23 C24 C25 120.73(19) . . ? 
C26 C25 C24 120.0(2) . . ? 
C27 C26 C25 119.6(2) . . ? 
C26 C27 C28 120.5(2) . . ? 
C27 C28 C23 120.76(19) . . ? 
  
_diffrn_measured_fraction_theta_max    0.994 
_diffrn_reflns_theta_full              27.50 
_diffrn_measured_fraction_theta_full   0.998 
_refine_diff_density_max    0.351 
_refine_diff_density_min   -0.350 
_refine_diff_density_rms    0.066 
